# Supplementary material for: Bisphosphonates prevents the bone mineral loss in lymphoma patients treated with glucocorticoids: a prospective, randomized controlled phase 3 trial in China
Source: Research Square preprint supplement (doi:10.21203/rs.3.rs-907532/v1), 2021-10-12
Supplement: Supplementary file 1 [file 6fb56d5dfd69122b5fda813d.docx]

**Supplementary table 1. Distribution of osteopenia patients diagnosed at baseline (n=84).**

|  | Osteopenia number, n (%) |
| --- | --- |
| All patients | 44 (52.38%) |
| Male ≥ 50-years | 16(19.05%) |
| Female ≥ 50-years | 16(19.05%) |
| L1 | 33 (39.29%) |
| L2 | 36 (42.86%) |
| L3 | 29 (34.52%) |
| L4 | 28 (33.33%) |
| Left hip | 27 (32.14%) |

**Supplementary table 2. T score at 12th month after enrollment in randomized patients.**

| Location | Total patients  N=29  (mean±SD） | Zoledronic Acid group  N=16  (mean±SD） | Control group  N=13  (mean±SD） | Zoledronic Acid group *vs*. control group  *p* value |
| --- | --- | --- | --- | --- |
| L1 | 0.51±1.55 | -0.41±1.73 | -0.64±1.36 | 0.704 |
| L2 | 0.59±1.31 | -0.63±0.99 | -0.55±1.66 | 0.875 |
| L3 | 0.32±1.45 | -0.32±1.17 | -0.32±1.79 | 0.994 |
| L4 | 0.19±1.36 | -0.20±1.12 | -0.17±1.65 | 0.955 |
| Left femoral neck | 0.63±1.01 | -0.83±1.12 | -0.38±0.85 | 0.224 |
| Left Ward’s triangle | 1.26±1.16 | -1.44±1.15 | -1.05±1.18 | 0.377 |
| Left trochanter major | 0.81±1.10 | -1.13±0.91 | -0.42±1.22 | 0.096 |
| Left hip | 0.48±1.00 | -0.70±1.01 | -0.22±0.96 | 0.199 |

**Supplementary table 3. T score changes of from baseline to 12th month in control group.**

|  | Baseline T score | 12th month T score | *p* value |
| --- | --- | --- | --- |
| L1 | -0.31±1.15 | -0.64±1.36 | 0.023 |
| L2 | -0.19±1.60 | -0.55±1.66 | 0.039 |
| L3 | -0.09±1.92 | -0.32±1.79 | 0.229 |
| L4 | 0.18±1.81 | -0.17±1.65 | 0.037 |
| Left femoral neck | -0.18±0.89 | -0.38±0.85 | 0.020 |
| Left Ward’s triangle | -0.73±1.28 | -1.05±1.18 | 0.012 |
| Left trochanter major | -0.41±1.29 | -0.42±1.22 | 0.805 |
| Left Hip | -0.14±0.96 | -0.22±0.96 | 0.128 |

**Supplementary table 4. T score changes from baseline to 12th month in Zoledronic Acid group.**

|  | Baseline T score | 12th month T score | *p* value |
| --- | --- | --- | --- |
| L1 | -0.56±1.54 | -0.41±1.73 | 0.123 |
| L2 | -0.90±1.15 | -0.63±0.99 | 0.024 |
| L3 | -0.55±1.30 | -0.32±1.17 | 0.026 |
| L4 | -0.48±1.19 | -0.20±1.12 | 0.029 |
| Left femoral neck | -0.70±1.19 | -0.83±1.12 | 0.044 |
| Left Ward’s triangle | -1.37±1.16 | -1.44±1.15 | 0.234 |
| Left trochanter major | -1.24±0.95 | -1.13±0.91 | 0.147 |
| Left hip | -0.68±0.98 | -0.70±1.01 | 0.456 |
